# Supplementary material for: Fatigue and Arousal Modulations Revealed by Saccade and Pupil Dynamics
Source: MDPI journal article supplement (doi:10.3390/ijerph19159234), 2022-07-28
Supplement: s1 [file s1]

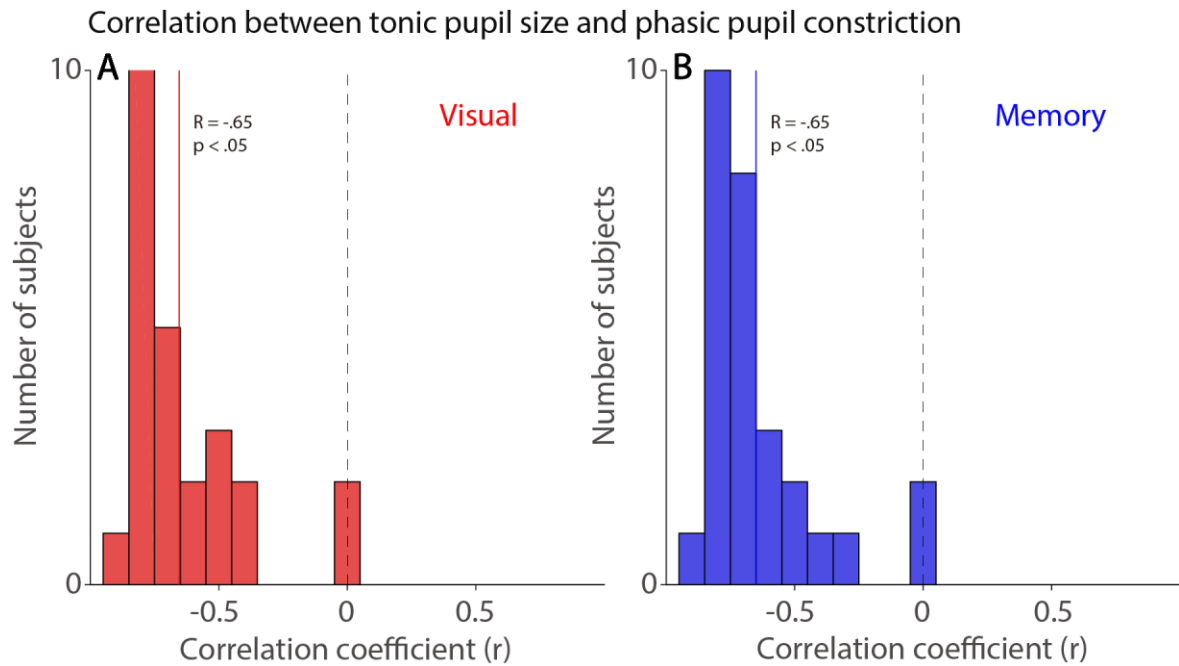

**Supplementary Figure S1. Partial correlation between tonic pupil size and phasic pupil constriction with trial number controlled in Experiment 1.** (A,B) Distribution of correlation coefficients for the relationship between tonic pupil size and phasic pupil constriction size in the visually-guided (A) and memory-guided (B) saccade task for all subjects. The vertical black dashed line represents a zero value of the correlation coefficient ( $r = 0$ ), and the vertical colored line represents the mean value of the correlation coefficient. Visual: visually-guided saccade task. Memory: memory-guided saccade task.

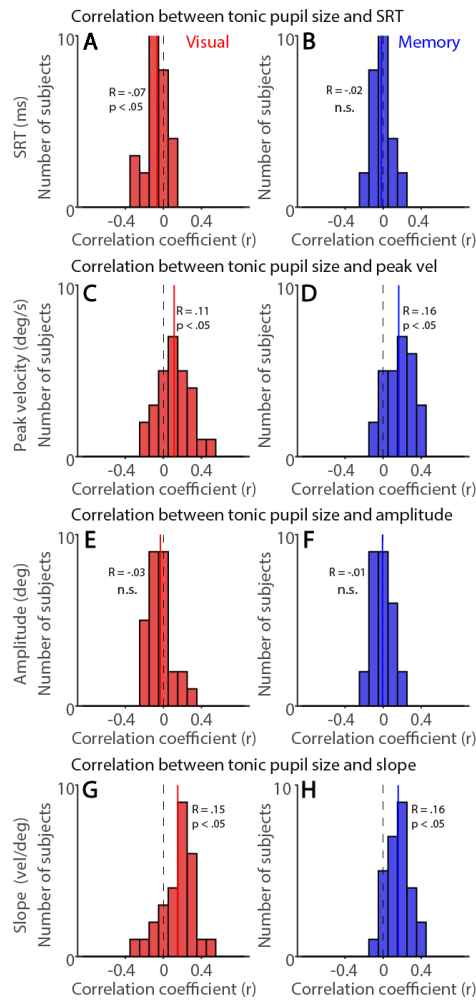

**Supplementary Figure S2. Partial correlation between tonic pupil size and saccade latency and metrics with trial number controlled in Experiment 1.** (A,B) Distribution of correlation coefficients for the relationship between tonic pupil size and SRT in the visually-guided (A) and memory-guided (B) saccade task for all subjects. (C,D) Distribution of correlation coefficients for the relationship between tonic pupil size and saccade peak velocity in the visually-guided (C) and memory-guided (D) saccade task for all subjects. (E,F) Distribution of correlation coefficients for the relationship between tonic pupil size and saccade amplitude in the visually-guided (E) and memory-guided (F) saccade task for all subjects. (G,H) Distribution of correlation coefficients for the relationship between tonic pupil size and main sequence slope (peak velocity/amplitude) in the visually-guided (G) and memory-guided (H) saccade task for all subjects. The vertical black dashed line represents a zero value of the correlation coefficient ( $r = 0$ ), and the vertical colored line represents the mean value of the correlation coefficient. Visual: visually-guided saccade task. Memory: memory-guided saccade task. n.s.: not significant.

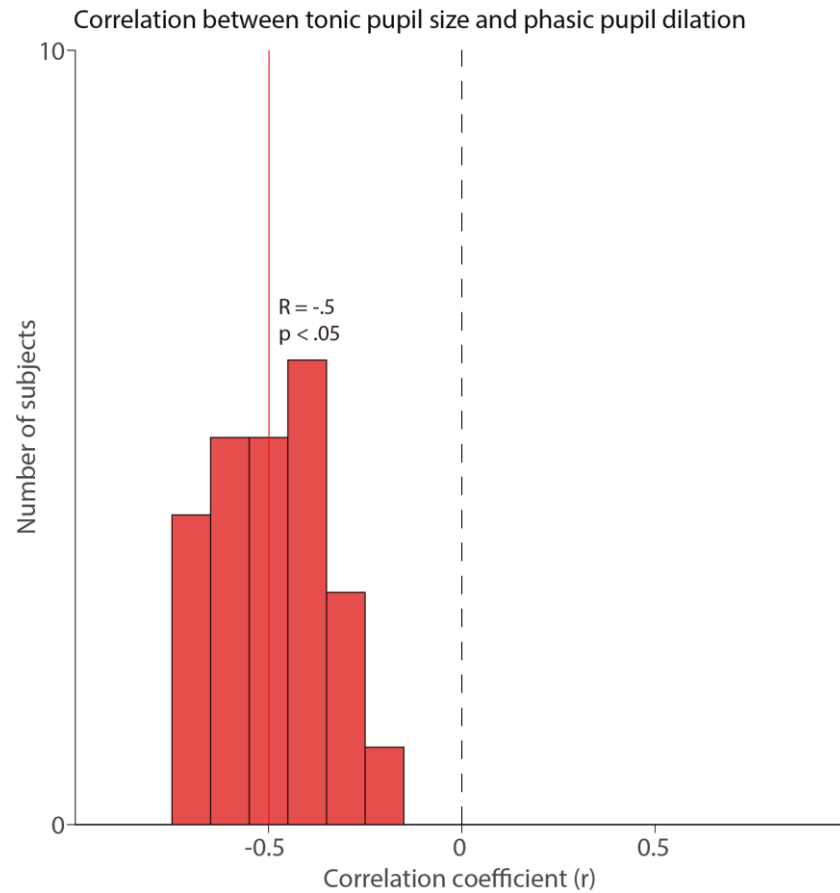

**Supplementary Figure S3. Partial correlation between tonic pupil size and phasic pupil dilation with trial number controlled in Experiment 2.** (A,B) Distribution of correlation coefficients for the relationship between tonic pupil size and phasic pupil constriction size in the visually-guided (A) and memory-guided (B) saccade task for all subjects. The vertical black dashed line represents a zero value of the correlation coefficient ( $r = 0$ ), and the vertical colored line represents the mean value of the correlation coefficient.

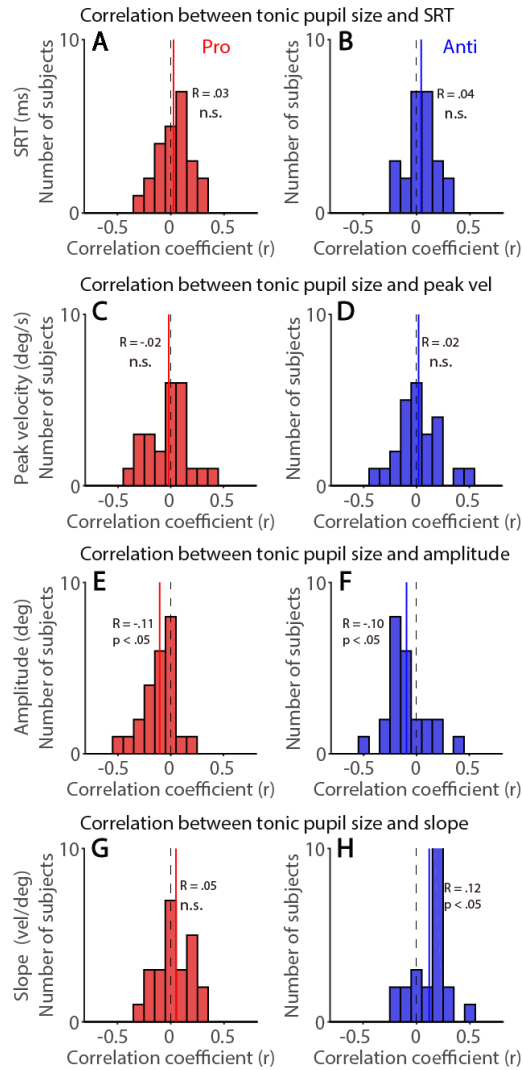

**Supplementary Figure S4. Partial correlation between tonic pupil size and saccade latency and metrics with trial number controlled in Experiment 2.** (A,B) Distribution of correlation coefficients for the relationship between tonic pupil size and SRT in the visually-guided (A) and memory-guided (B) saccade task for all subjects. (C,D) Distribution of correlation coefficients for the relationship between tonic pupil size and saccade peak velocity in the visually-guided (C) and memory-guided (D) saccade task for all subjects. (E,F) Distribution of correlation coefficients for the relationship between tonic pupil size and saccade amplitude in the visually-guided (E) and memory-guided (F) saccade task for all subjects. (G,H) Distribution of correlation coefficients for the relationship between tonic pupil size and main sequence slope (peak velocity/amplitude) in the visually-guided (G) and memory-guided (H) saccade task for all subjects. The vertical black dashed line represents a zero value of the correlation coefficient ( $r =$

0), and the vertical colored line represents the mean value of the correlation coefficient. Pro: pro-saccade task. Anti: anti-saccade task. n.s.: not significant.

**Table S1:** Summary for the mean partial correlation coefficient values for each correlational analysis in Experiment 1 (N = 28). \* indicates statistically significant. Numbers in the bracket indicates the percentage of participants showing the same sign of correlation. SRT: saccade reaction time. Peak Vel: saccade peak velocity. Amplitude: saccade amplitude. Slope: the main sequence slope (peak velocity/amplitude). Tonic pu: tonic pupil size. Phasic pu: phasic pupil constriction. Visual: visually-guided saccade task. Memory: memory-guided saccade task.

| Exp 1  |                  | SRT          | Peak Vel    | Amplitude   | Slope       | Phasic pu    |
|--------|------------------|--------------|-------------|-------------|-------------|--------------|
| Visual | Tonic pupil size | -0.07* (71%) | 0.11* (75%) | -0.03 (61%) | 0.15* (75%) | -0.65* (93%) |
| Memory |                  | -0.02 (61%)  | 0.16* (79%) | -0.01 (61%) | 0.16* (82%) | -0.65* (96%) |

**Table S2:** Summary for the mean partial correlation coefficient values for each correlational analysis in Experiment 2 (N = 24). \* indicates statistically significant. Numbers in the bracket indicates the percentage of participants showing the same sign of correlation. SRT: saccade reaction time. Peak Vel: saccade peak velocity. Amplitude: saccade amplitude. Slope: the main sequence slope (peak velocity/amplitude). Tonic pu: tonic pupil size. Phasic pu: phasic pupil dilation. Pro: pro-saccade task. Anti: anti-saccade task.

| Exp 2 |                  | SRT        | Peak Vel    | Amplitude    | Slope       | Phasic pu     |
|-------|------------------|------------|-------------|--------------|-------------|---------------|
| Pro   | Tonic pupil size | 0.03 (50%) | -0.02 (50%) | -0.11* (71%) | 0.05 (67%)  | -0.50* (100%) |
| Anti  |                  | 0.04 (71%) | 0.02 (50%)  | -0.10* (75%) | 0.12* (79%) |               |
